# Supplementary material
Source: Springer Nature journal article supplement (https://www.springermedizin.de/resource/supplementary/13063_2010_559_MOESM3_ESM.pdf/9618732)

**Sample size = 750 x 4**

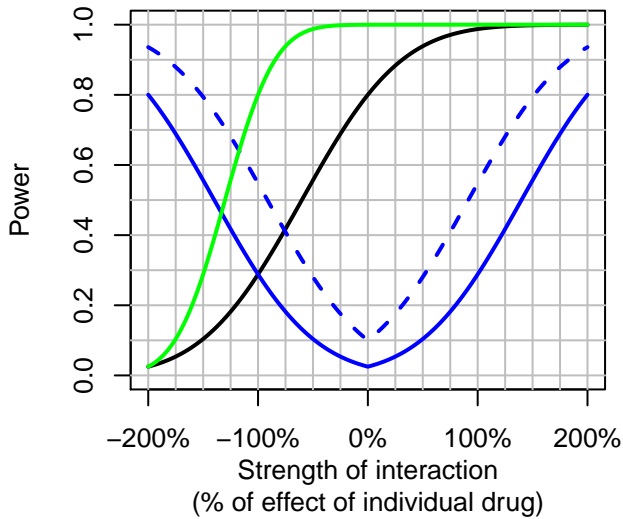

**Sample size = 750 x 8**

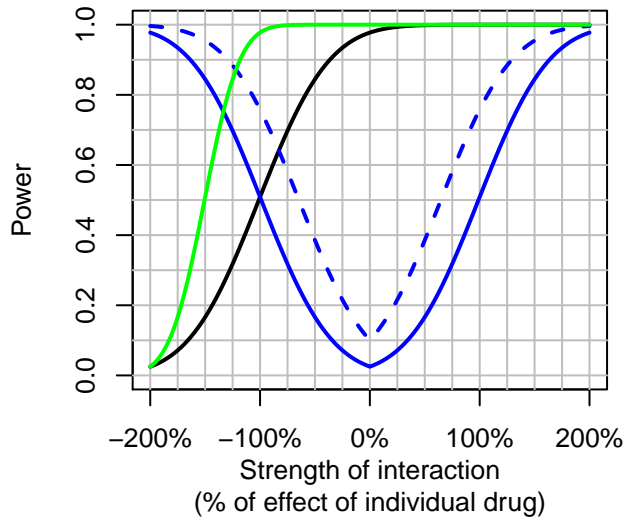

**Sample size = 750 x 12**

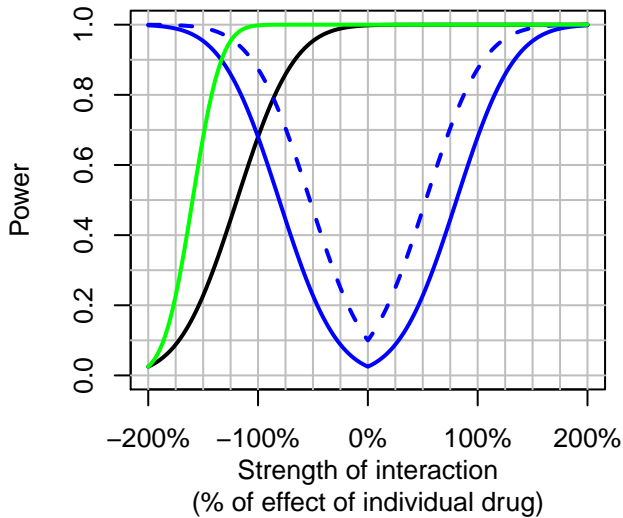

**Sample size = 750 x 16**

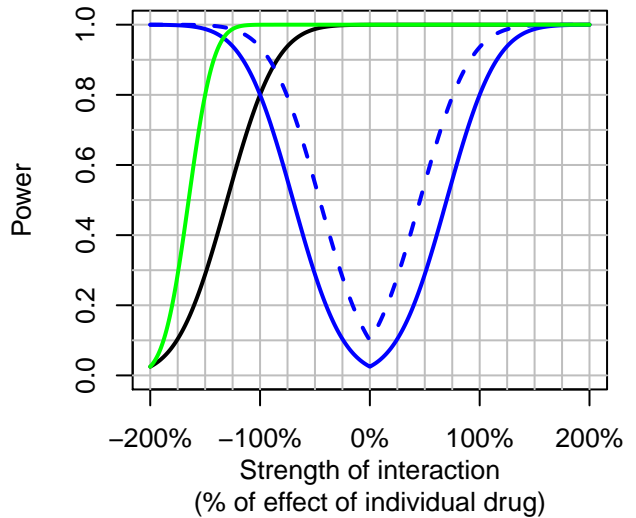

Supplement: MOESM3 [file 9618732]
